# Supplementary material for: Lipase/tannic acid magnetic hydrogel microspheres and their continuous catalytic application
Source: Royal Society of Chemistry journal article supplement (doi:10.1039/d3nj03268j), 2023-01-01
Supplement: d3nj03268j1.pdf [file d3nj03268j1.pdf]

1 **Lipase/tannic acid magnetic hydrogel microspheres and its**  
2 **continuous catalytic application**

3 Xuan Ji<sup>1,2</sup>, Yao Li<sup>3</sup>, Suo Wang<sup>2</sup>, Xu Fei<sup>\*1</sup>, Jing Tian<sup>\*2</sup>, Longquan Xu<sup>1</sup>, Yi

4 Wang<sup>2</sup>

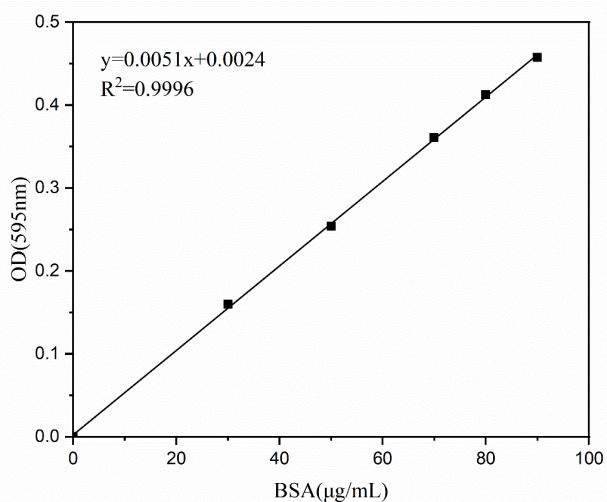

5  
6 **Fig. S1** The protein standard curve of BSA

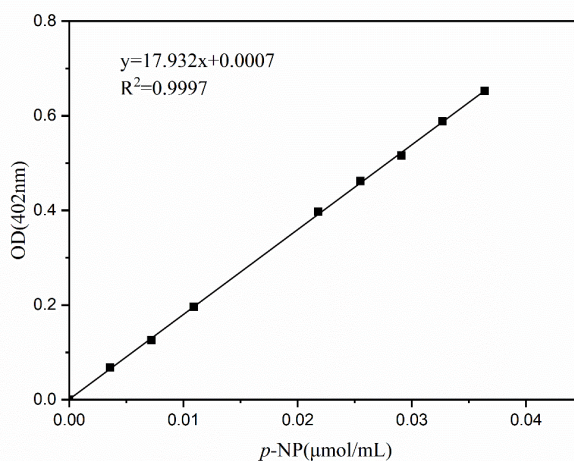

7  
8 **Fig. S2** The standard curve of p-NP

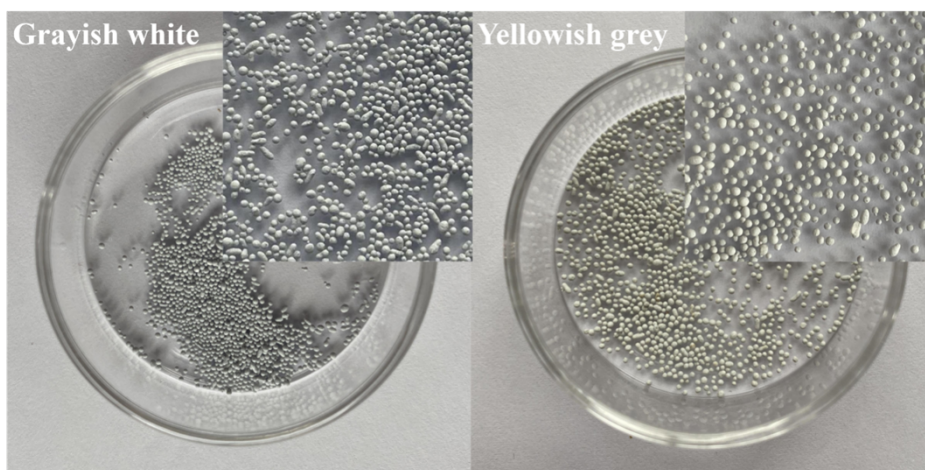

9

10

**Fig.S3** Photographs of PM and PTAM

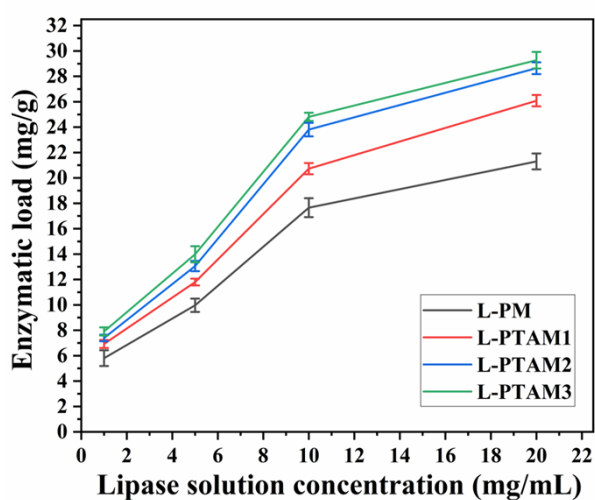

11

12 **Fig.S4** The effect of PM, PTAM1, PTAM2 and PTAM3 on lipase loaded in lipase  
 13 solutions with different concentrations (n=3)

14

15 **Table S1.** The EDS data of elements C, N, O, S and Fe content in the L-PM and L-  
 16 PTAMs

| Sample/Element | L-PM  | L-PTAM1 | L-PTAM2 | L-PTAM3 |
|----------------|-------|---------|---------|---------|
|                | Wt%   |         |         |         |
| C              | 54.28 | 51.57   | 55.95   | 53.08   |
| N              | 14.47 | 15.89   | 10.86   | 12.22   |
| O              | 30.49 | 31.68   | 32.00   | 33.37   |

|       |        |        |        |        |
|-------|--------|--------|--------|--------|
| S     | 0.17   | 0.32   | 0.44   | 0.49   |
| Fe    | 0.89   | 0.63   | 0.76   | 0.84   |
| Total | 100.00 | 100.00 | 100.00 | 100.00 |

17

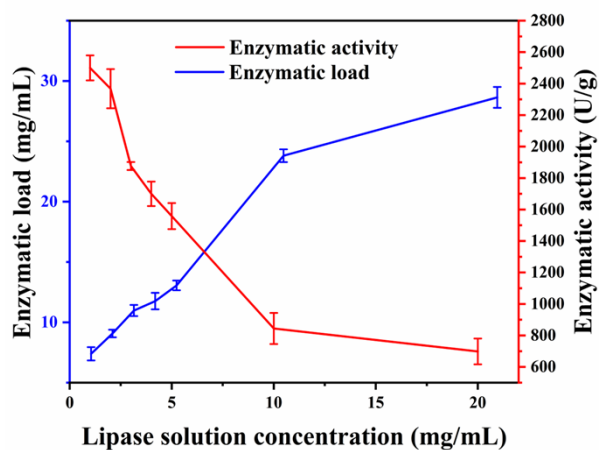

18

19 **Fig. S5.** The enzymatic load and enzymatic activity of L-PTAM2 at different  
20 concentrations of lipase solution on (n = 3)

21

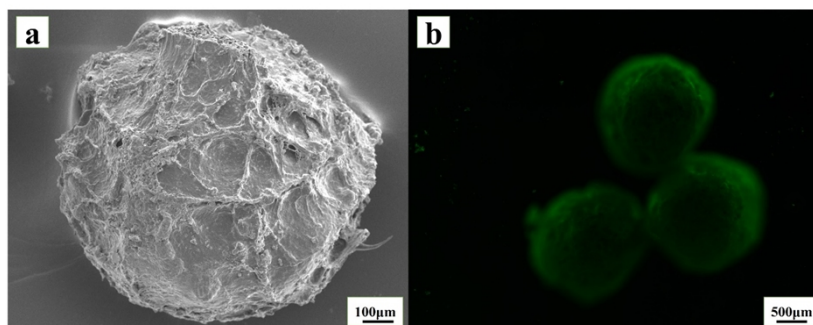

22

23 **Fig.S6.** (a) The SEM image of L-PTAM2-20 after 20 cycles; (b) The fluorescence  
24 image of L-PTAM2-20 after 20 cycles

25

26 Detailed calculation of kinetic parameters:

27 The Lineweaver-Burk double-reciprocal plot method was used  
28 to determine the free lipase and L-PTAM2 Michaelis-Menten  
29 constants ( $K_m$ ) and maximum reaction velocities ( $V_{max}$ ) values. The *p*-  
30 NPP substrate was used at various concentration from 0.165 mM to

31 1.815 mM, and the amount of free lipase used was identical to that on  
 32 the L-PTAM2.

33 **Table S2** Reaction rates (V) in different substrate concentrations (S)

| <i>p</i> -NPP (μmol/mL) |             | 0.165  | 0.495  | 0.825  | 1.155  | 1.485  | 1.815  |
|-------------------------|-------------|--------|--------|--------|--------|--------|--------|
| V                       | Free lipase | 0.2526 | 0.7672 | 1.1790 | 1.4571 | 1.6889 | 1.8096 |
| (U/mg)                  | L-PTAM2     | 0.1937 | 0.3621 | 0.7401 | 1.5347 | 1.7325 | 2.1017 |

34

35 **Table S3** The 1/S and 1/V

| 1/S |             | 0.5510 | 0.6734 | 0.8658 | 1.2121 | 2.0202 | 6.0606 |
|-----|-------------|--------|--------|--------|--------|--------|--------|
| 1/V | Free lipase | 0.5526 | 0.5921 | 0.6863 | 0.8482 | 1.3034 | 3.9582 |
|     | L-PTAM2     | 0.4758 | 0.5772 | 0.6516 | 1.3511 | 2.7618 | 5.1625 |

36

37 Use 1/ S and 1/ V to plot:

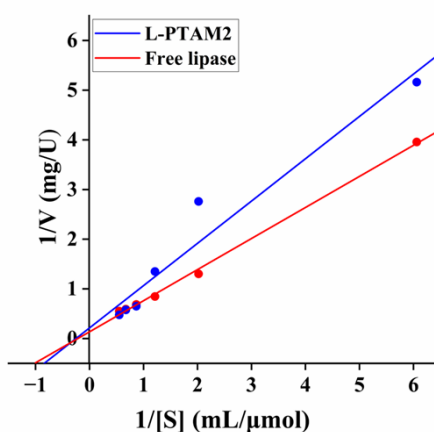

38

39 **Fig. S7** The Lineweaver-Burk plot of free lipase and L-PTAM2

40 Calculated as follows :

$$41 \quad \frac{1}{V} = \frac{K_m}{V_{max}} \times \frac{1}{[S]} + \frac{1}{V_{max}}$$

42 The  $K_m$  and  $V_{max}$  values of free lipase and L-PTAM2 were obtained  
 43 by calculating the curve intercepts on X-axis and Y-axis, and shown as  
 44 follow.

45 **Table S4** The kinetic parameters of free lipase and L-PTAM2

| Sample      | $V_{max}$ (U/mg) | $K_m$ ( $\mu\text{mol/mL}$ ) |
|-------------|------------------|------------------------------|
| Free lipase | 4.6466           | 3.9550                       |
| L-PTAM2     | 7.3174           | 4.5775                       |

46

47 Thin layer chromatography purification analysis

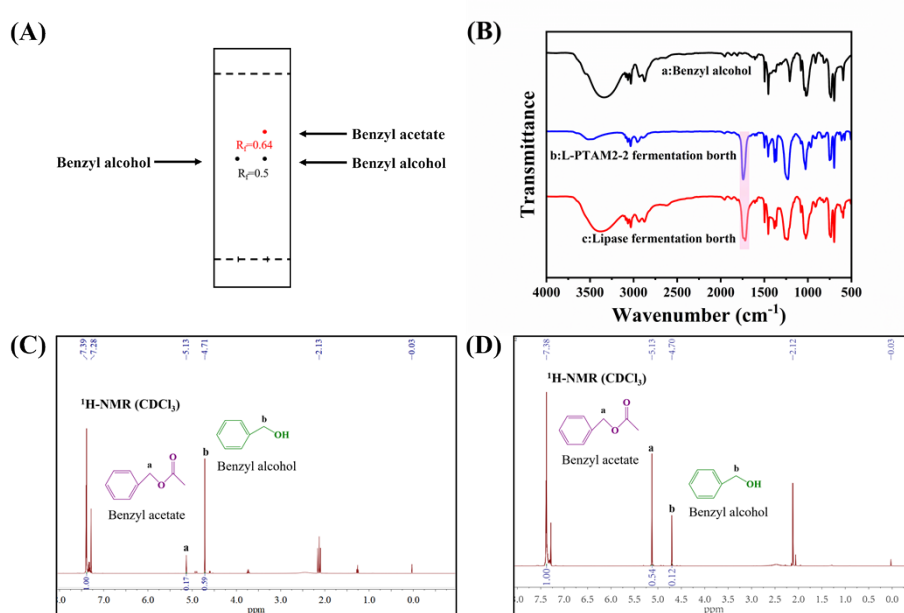

48

49 **Fig. S8.** (A) TLC schematic diagram of benzyl alcohol and benzyl acetate; (B) The  
 50 FT-IR spectra of (a) benzyl alcohol, (b) benzyl acetate product catalyzed by L-PTAM2-  
 51 2, and (c) lipase fermentation broth (C)  $^1\text{H}$  NMR (400 MHz) spectrum of the benzyl  
 52 acetate product catalyzed by lipase fermentation broth; (D)  $^1\text{H}$  NMR (400 MHz)  
 53 spectrum of the benzyl acetate product catalyzed by L-PTAM2 fermentation broth.

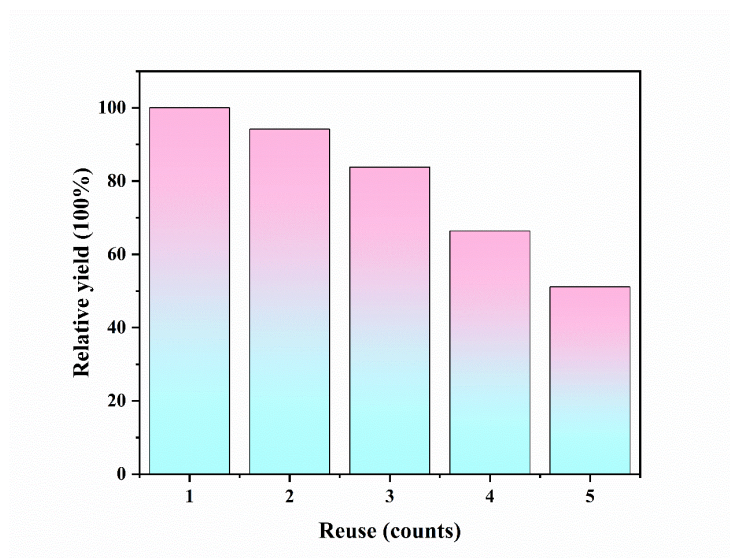

54

55 **Fig. S9.** The relative yield of benzyl acetate in the continuous reaction

56

57 The uniform mixed solution of 2 g of benzyl alcohol and 20 g of vinyl  
58 acetate was dropped into the reactor at a flow rate of 3ml/min, and the  
59 mixed solution was kept in contact with L-PTAM2. After the reaction, the  
60 valve was opened to collect the product to test the reusability of L-PTAM2.



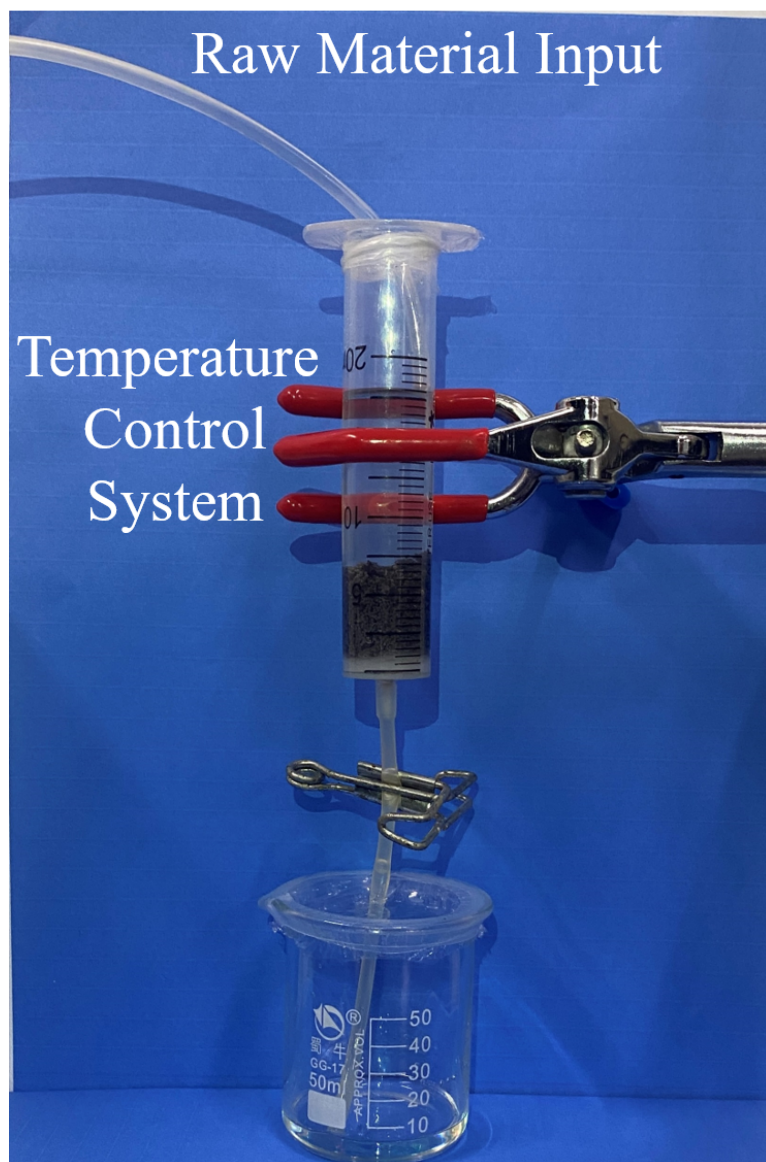

61

62

63

**Fig.S10.** The photo of the experimental device for continuously catalyzing the synthesis of benzyl acetate with L-PTAM2 as catalyst.
